# Supplementary material for: Hyperinflammatory environment drives dysfunctional myeloid cell effector response to bacterial challenge in COVID-19
Source: PubMed Central journal article supplement (PMC8782468; doi:10.1371/journal.ppat.1010176), 2022-01-10
Supplement: ppat.1010176.s001.pdf [file ppat.1010176.s001.pdf]

S1 Table: Clinical characteristics of the patients

| Clinical Characteristics                     | 1 <sup>st</sup> Wave (March 2020 – June 2020) | 2 <sup>nd</sup> Wave (July 2020 – December 2020) |
|----------------------------------------------|-----------------------------------------------|--------------------------------------------------|
| Study Patients                               | Study Patients (n=25)                         | Study Patients (n=38)                            |
| Age (mean ± SD)                              | 60.3 (±9.0)                                   | 63.2 (±13.4)                                     |
| Male (%)                                     | 20 (80%)                                      | 27 (71%)                                         |
| Diabetes (%)                                 | 12 (48%)                                      | 12 (32%)                                         |
| COPD/Asthma (%)                              | 5 (20%)                                       | 4 (11%)                                          |
| Charlson Comorbidity Index (median)          | 1.0                                           | 1.0                                              |
| Malignancy (%)                               | 3 (12%)                                       | 3 (8%)                                           |
| Immunosuppression (%)                        | 4 (16%)                                       | 2 (5%)                                           |
| 28 Day Survival (%)                          | 22 (88%)                                      | 31 (82%)                                         |
| Alive at ICU Discharge (%)                   | 20 (80%)                                      | 31 (82%)                                         |
| Bacterial Superinfection (%)                 | 16 (64%)                                      | 21 (55%)                                         |
| Mechanical Ventilation (%)                   | 24 (96%)                                      | 36 (95%)                                         |
| Length of Mechanical Ventilation (mean ± SD) | 22.2* (±21.6)                                 | 11.7 (±11.1)                                     |
| Length of ICU-Stay (mean ± SD)               | 29.0* (±27.0)                                 | 14.6 (±12.6)                                     |
| SOFA Score Day 1 (median)                    | 8.0                                           | 7.0                                              |
| SAPS on Admission (median)                   | 36                                            | 36.0                                             |
|                                              |                                               |                                                  |

COPD, Chronic Obstructive Pulmonary Disease; ICU, Intensive Care Unit; SD, Standard deviation; SOFA, Sepsis-related organ failure assessment score; SAPS, Simplified Acute Physiology Score.

\* One patient received dexamethasone at a later time point after the experimental sampling and therefore was excluded from temporal analyses.
