# Supplementary material for: Hyperinflammatory environment drives dysfunctional myeloid cell effector response to bacterial challenge in COVID-19
Source: PubMed Central journal article supplement (PMC8782468; doi:10.1371/journal.ppat.1010176), 2022-01-10
Supplement: ppat.1010176.s002.pdf [file ppat.1010176.s002.pdf]

S2 Table: Treatment received by the patients in COVID-19 wave 1 and wave 2

| Wave 1 | Acute phase<br>(n=25) |                    |               |                          | Recovery phase<br>(n=19) |                    |               |                          |
|--------|-----------------------|--------------------|---------------|--------------------------|--------------------------|--------------------|---------------|--------------------------|
|        | Anti-infectives       | Hydroxy-chloroquin | Steroids      | Other Immuno-suppression | Anti-infectives          | Hydroxy-chloroquin | Steroids      | Other Immuno-suppression |
| Total  | 24/25<br>(96%)        | 11/25<br>(44%)     | 7/25<br>(28%) | 4/25<br>(16%)            | 12/19<br>(63%)           | 0/20<br>(0%)       | 7/19<br>(36%) | 3/19<br>(16%)            |

  

| Wave 2 | Acute phase<br>(n=38) |                    |                 |                          | Recovery phase<br>(n=21) |                    |                  |                          |
|--------|-----------------------|--------------------|-----------------|--------------------------|--------------------------|--------------------|------------------|--------------------------|
|        | Anti-infectives       | Hydroxy-chloroquin | Steroids        | Other Immuno-suppression | Anti-infectives          | Hydroxy-chloroquin | Steroids         | Other Immuno-suppression |
| Total  | 37/38<br>(97%)        | 0/38 (0%)          | 38/38<br>(100%) | 3/38 (7.9%)              | 9/21<br>(42%)            | 0/21 (0%)          | 10/21<br>(47.6%) | 1/21 (4.7%)              |

Definitions:

Anti-infective: Use of either/or antibiotics, antivirals, antifungals in the last 48 hours before sampling. The use of prophylactic anti-infective treatment (e.g. trimethoprim-sulfamethoxazole 3x/week) was not considered in this analysis.

Hydroxychloroquin: Use of hydroxychloroquin in the last 7 days before sampling

Steroids: Any use of steroids equivalent to 20mg prednisone per day in the last 48 hours before sampling
