# Supplementary material for: Hyperinflammatory environment drives dysfunctional myeloid cell effector response to bacterial challenge in COVID-19
Source: PubMed Central journal article supplement (PMC8782468; doi:10.1371/journal.ppat.1010176), 2022-01-10
Supplement: ppat.1010176.s003.pdf [file ppat.1010176.s003.pdf]

S3 Table: List of antibodies and concentrations used in this study

| Neutrophils Intracellular effectors |         |          |                           |                                |                     |                |              |
|-------------------------------------|---------|----------|---------------------------|--------------------------------|---------------------|----------------|--------------|
| Laser                               | Channel | Emission | Fluorochrome              | Antigen                        | Clone               | Dilution (1:x) | Manufacturer |
| Violet                              | 450/50  | 445      | eFluor 450                | MPO                            | 455-BE6             | 100            | ThermoFisher |
|                                     | 525/50  | 526      |                           | LIVE/DEAD Fixable Aqua         |                     | 500            | ThermoFisher |
| Blue                                | 530/30  | 517      | FITC                      | CellROX Green                  |                     | 500            | ThermoFisher |
| Yellow                              | 586/15  | 576      | PE                        | CD15                           | HI98                | 50             | ThermoFisher |
| Neutrophils NETs                    |         |          |                           |                                |                     |                |              |
| Laser                               | Channel | Emission | Fluorochrome              | Antigen                        | Clone               | Dilution (1:x) | Manufacturer |
| Violet                              | 450/50  | 445      | eFluor 450                | MPO                            | 455-BE6             | 100            | ThermoFisher |
|                                     | 525/50  | 526      |                           | LIVE/DEAD Fixable Aqua         |                     | 500            | ThermoFisher |
| Blue                                | 530/30  | 517      | FITC                      | SYTOX Green                    | BB1E2               | 100            | ThermoFisher |
| Yellow                              | 586/15  | 576      | PE                        | CD15                           | HI98                | 50             | ThermoFisher |
| Neutrophils Panel                   |         |          |                           |                                |                     |                |              |
| Laser                               | Channel | Emission | Fluorochrome              | Antigen                        | Clone               | Dilution (1:x) | Manufacturer |
| Violet                              | 450/50  | 445      | eFluor 450                | CD15                           | HI98                | 50             | ThermoFisher |
|                                     | 525/50  | 526      | BV 510                    | CD195 (CCR5)                   | J418F1              | 50             | Biologend    |
|                                     | 610/20  | 601      | BV 605                    | CD184 (CXCR4)                  | 12G5                | 50             | Biologend    |
| Blue                                | 530/30  | 517      | FITC                      | CD181 (CXCR1)                  | 8F1-1-4             | 50             | ThermoFisher |
|                                     | 670/30  | 708      | PerCP-eFluor 710          | CD182 (CXCR2)                  | 5E8-C7-F10          | 50             | ThermoFisher |
| Yellow                              | 586/15  | 576      | PE                        | CD193 (CCR3)                   | 12-1939-42          | 50             | ThermoFisher |
|                                     | 610/20  | 606      | PE-eFluor 610             | CD183 (CXCR3)                  | CEW33D              | 50             | ThermoFisher |
|                                     | 780/60  | 780      | PE-Cy7                    | CD191 (CCR1)                   | 5F10B29             | 50             | Biologend    |
| Red                                 | 670/30  | 660      | APC                       | CD66b                          | G10F5               | 50             | ThermoFisher |
|                                     | 720/30  | 785      | AF 700                    | CD88 (C5aR)                    | S5/1                | 50             | Biologend    |
|                                     | 780/60  | 785      |                           | LIVE/DEAD Fixable Near-IR      |                     | 750            | ThermoFisher |
| Monocytes Intracellular effectors   |         |          |                           |                                |                     |                |              |
| Laser                               | Channel | Emission | Fluorochrome              | Antigen                        | Clone               | Dilution (1:x) | Manufacturer |
| Violet                              | 525/50  | 526      |                           | LIVE/DEAD Fixable Aqua         |                     | 500            | ThermoFisher |
|                                     | 610/20  | 601      | SB 600                    | CD45                           | 2D1                 | 100            | ThermoFisher |
| Blue                                | 530/30  | 517      | FITC                      | CellROX Green/DAF-FM Diacetate |                     | 500/100        | ThermoFisher |
|                                     | 670/30  | 708      | PerCp                     | CD14                           | 61D3                | 50             | ThermoFisher |
| Yellow                              | 586/15  | 576      | PE                        | CD16                           | eBioCB16 (CB16)     | 50             | ThermoFisher |
|                                     | 780/60  | 780      | Pe-Cyanine7               | HLA-DR                         | LN3                 | 50             | ThermoFisher |
| Monocytes Panel 1                   |         |          |                           |                                |                     |                |              |
| Laser                               | Channel | Emission | Fluorochrome              | Antigen                        | Clone               | Dilution (1:x) | Manufacturer |
| Violet                              | 450/50  | 445      | eFluor 450                | HLA-DR                         | LN3                 | 50             | ThermoFisher |
|                                     | 525/50  | 526      | eFluor 506                | CD45                           | HI30                | 50             | ThermoFisher |
|                                     | 610/20  | 601      | SB 600                    | CD14                           | 61D3                | 50             | ThermoFisher |
| Blue                                | 530/30  | 517      | FITC                      | CD64                           | 10.1                | 50             | ThermoFisher |
|                                     | 670/30  | 708      | PerCP-eFluor 710          | CD163                          | eBioGHI/61 (GHI/61) | 50             | ThermoFisher |
| Yellow                              | 586/15  | 576      | PE                        | CD16                           | eBioCB16 (CB16)     | 50             | ThermoFisher |
|                                     | 695/40  | 561      | PE-Cy5                    | CD86                           | IT2.2               | 50             | ThermoFisher |
|                                     | 780/60  | 780      | PE-Cy7                    | CD206 (MMR)                    | 19.2                | 50             | ThermoFisher |
| Red                                 | 670/30  | 660      | APC                       | CD169 (Siglec-1)               | 7-239               | 50             | ThermoFisher |
|                                     | 720/30  | 785      | AF 700                    | CD11b                          | VIM12               | 50             | ThermoFisher |
|                                     | 780/60  | 785      | APC-eFluor 780            | CD3                            | UCHT1               | 50             | ThermoFisher |
|                                     | 780/60  | 785      | APC-eFluor 780            | CD19                           | HIB19               | 50             | ThermoFisher |
|                                     | 780/60  | 785      | APC-eFluor 780            | CD56                           | CMSSB               | 50             | ThermoFisher |
| 780/60                              | 785     |          | LIVE/DEAD Fixable Near-IR |                                | 750                 | ThermoFisher   |              |
| Monocytes Panel 2                   |         |          |                           |                                |                     |                |              |
| Laser                               | Channel | Emission | Fluorochrome              | Antigen                        | Clone               | Dilution (1:x) | Manufacturer |
| Violet                              | 450/50  | 445      | eFluor 450                | HLA-DR                         | LN3                 | 50             | ThermoFisher |

|        |        |     |                  |                           |                 |     |              |
|--------|--------|-----|------------------|---------------------------|-----------------|-----|--------------|
|        | 525/50 | 526 | eFLuor 506       | CD45                      | HI30            | 50  | ThermoFisher |
|        | 610/20 | 601 | Super Bright 600 | CD14                      | 61D3            | 50  | ThermoFisher |
| Blue   | 530/30 | 517 | FITC             | CD119                     | BB1E2           | 50  | ThermoFisher |
|        | 670/30 | 708 | PerCP-Cy5.5      | CD192 (CCR2)              | K036C2          | 50  | Biolegend    |
| Yellow | 586/15 | 576 | PE               | CD16                      | eBioCB16 (CB16) | 50  | ThermoFisher |
|        | 620/15 | 606 | PE-Dazzle 594    | CD80                      | 2D10            | 50  | Biolegend    |
|        | 780/60 | 780 | PE-Cyanine7      | CD120b                    | 3G7A02          | 50  | Biolegend    |
| Red    | 670/30 | 660 | APC              | CX3CR1                    | 2A9-1           | 50  | ThermoFisher |
|        | 720/30 | 785 | AF 700           | CD11b                     | VIM12           | 50  | ThermoFisher |
|        | 780/60 | 785 | APC-eFluor 780   | CD3                       | UCHT1           | 50  | ThermoFisher |
|        | 780/60 | 785 | APC-eFluor 780   | CD19                      | HIB19           | 50  | ThermoFisher |
|        | 780/60 | 785 | APC-eFluor 780   | CD56                      | CMSSB           | 50  | ThermoFisher |
|        | 780/60 | 785 |                  | LIVE/DEAD Fixable Near-IR |                 | 750 | ThermoFisher |
